# Supplementary material for: KCL TEST: an open-source inspired asymptomatic SARS-CoV-2 surveillance programme in an academic institution
Source: bioRxiv or medRxiv preprint supplement (doi:10.1101/2023.07.25.23293154), 2023-10-19
Supplement: Supplementary file [file media-1.pdf]

## **Supplemental Materials**

### **KCL TEST: an open-source inspired SARS-CoV-2 surveillance programme in an academic institution**

Reis de Andrade, J., Scourfield, E., Peswani-Sajani, S., Poulton, K., Ap Rees, T., Khooshemehri, P., O'Doherty, G., Ong, S., Ivan, I., Goudarzi, N., Gardiner, I., Caine, E., Maguire, T., Leightley, D., Torrico, L., Gasulla, A., Tan, A.V.F., Griffin, A., Papaioannou, S., Trouillet, C., Mischo, H., Giralt, V., C., Wilson, S., Kirk, M., Martindale, J., Curtis, C., Zuckerman, M., Razavi, R., Malim, M.H., Martinez-Nunez, R.T.

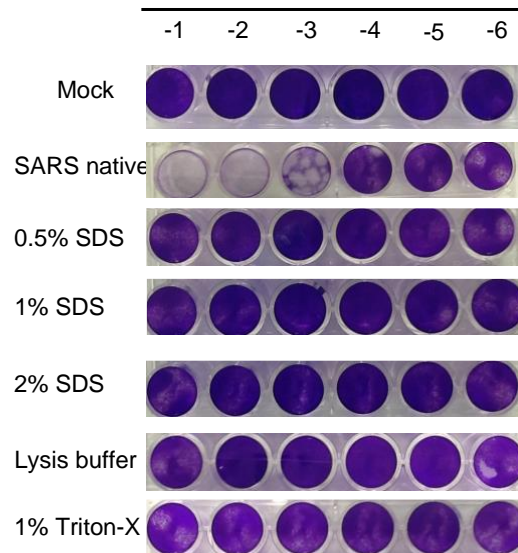

**Supplemental Figure 1. Plaque assays demonstrating inactivation of SARS-CoV-2 in saliva.** Our collection tubes contained 2% SDS and thus we tested decreasing concentrations of the detergent on plaque assays, using increasing amounts of SDS, buffer or 1% Triton-X. Vero E6 TMPRSS2 were employed. All samples spun through size exclusion columns (Amicon) 3 times to remove any detergent contaminants that would also kill cells.

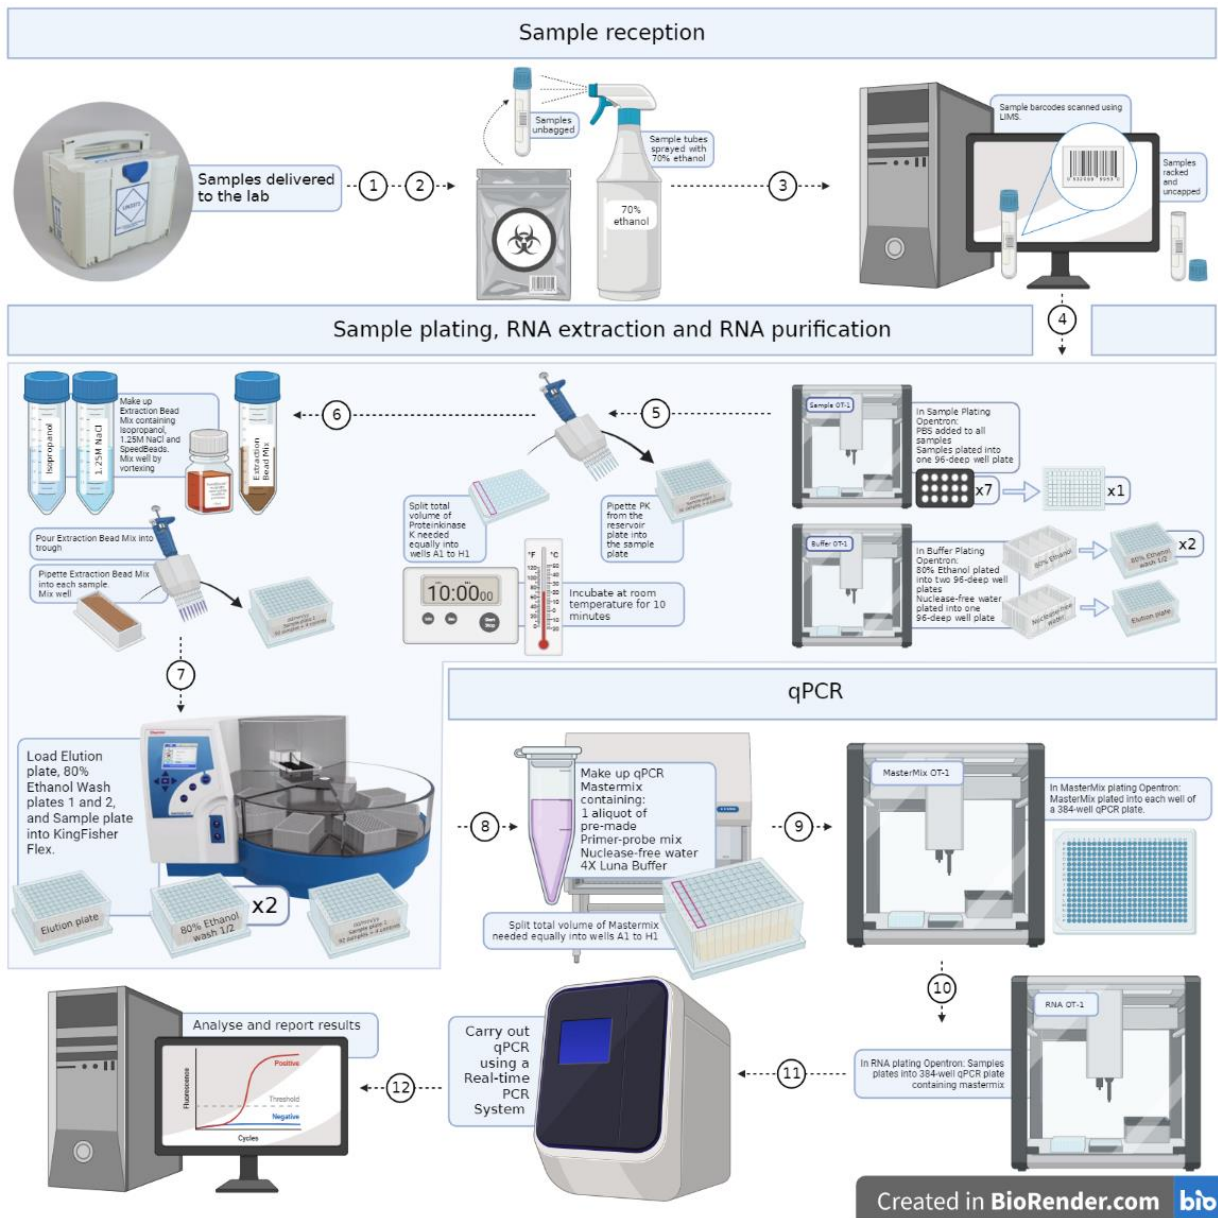

**Supplemental Figure 2. Detailed diagram of our testing pipeline.** Detailed step by step diagram of our workflow in the laboratory, from sample reception to result reporting.

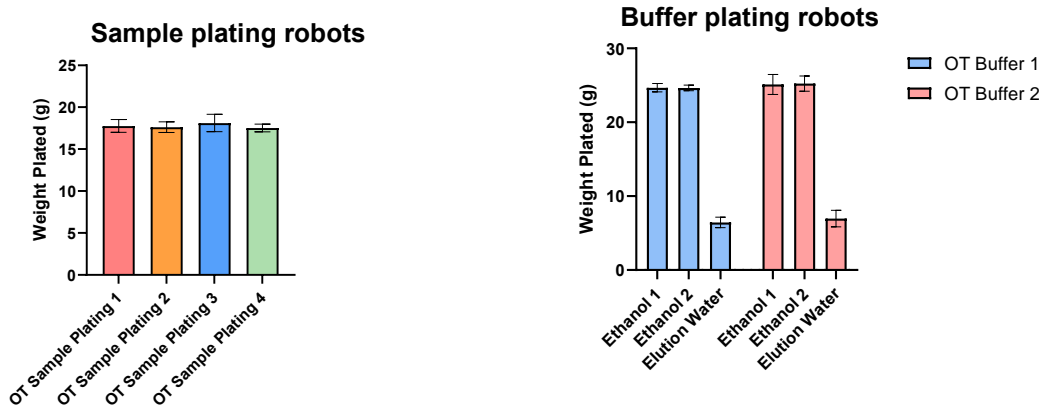

**Supplemental Figure 3. Accuracy of sample plating and buffer plating OT-2 robots.** Each OT-2 was tested over 3 days and filled plates were weighted to determine if different machines had different accuracy. Our data showed that all robots performed equally in their plating.

|   | 1                | 2     | 3   | 4     | 5   | 6                | 7     | 8     | 9      | 10  | 11    | 12               |
|---|------------------|-------|-----|-------|-----|------------------|-------|-------|--------|-----|-------|------------------|
| A | H <sub>2</sub> O | Neg   | Neg | Neg   | Neg | Neg              | Neg   | Neg   | Neg    | Neg | Neg   | Neg              |
| B | Neg              | Neg   | Neg | Neg   | Neg | POS 1            | Neg   | Neg   | POS 10 | Neg | Neg   | Neg              |
| C | Neg              | POS 4 | Neg | Neg   | Neg | Neg              | Neg   | Neg   | Neg    | Neg | Neg   | Neg              |
| D | Neg              | Neg   | Neg | POS 7 | Neg | Neg              | POS 8 | Neg   | Neg    | Neg | POS 3 | Neg              |
| E | Neg              | Neg   | Neg | Neg   | Neg | Neg              | Neg   | Neg   | POS 6  | Neg | Neg   | Neg              |
| F | Neg              | POS 2 | Neg | Neg   | Neg | POS 5            | Neg   | Neg   | Neg    | Neg | Neg   | Neg              |
| G | Neg              | Neg   | Neg | Neg   | Neg | Neg              | Neg   | POS 9 | Neg    | Neg | Neg   | H <sub>2</sub> O |
| H | Neg              | Neg   | Neg | Neg   | Neg | H <sub>2</sub> O | Neg   | Neg   | Neg    | Neg | Neg   | PEC              |

**Supplemental Figure 4. Example Interspersed Positive Plate and respective colour key.** These layouts were repeated for all combinations of our Kingfisher Flex RNA extractors and thermocyclers. Neg: negative sample, POS positive sample, PEC Positive Extraction Control.

|       |       |       |       |       |       |       |       |       |       |       |       |
|-------|-------|-------|-------|-------|-------|-------|-------|-------|-------|-------|-------|
| -     | 25.58 | -     | 28.30 | -     | 25.19 | -     | 23.90 | -     | 26.39 | -     | 23.97 |
| 24.85 | -     | 26.02 | -     | 25.28 | -     | 24.46 | -     | 23.82 | -     | 25.36 | -     |
| -     | 25.55 | -     | 25.75 | -     | 25.33 | -     | 24.07 | -     | 24.91 | -     | 23.85 |
| 26.12 | -     | 25.39 | -     | 26.51 | -     | 24.10 | -     | 24.23 | -     | 23.85 | -     |
| -     | 25.81 | -     | 25.35 | -     | 25.29 | -     | 23.84 | -     | 24.00 | -     | 25.15 |
| 24.95 | -     | 25.84 | -     | 25.58 | -     | 23.90 | -     | 25.84 | -     | 24.82 | -     |
| -     | 25.34 | -     | 24.21 | -     | 24.24 | -     | 24.25 | -     | 24.31 | -     | -     |
| 25.10 | -     | 25.45 | -     | 25.26 | -     | 25.49 | -     | 23.83 | -     | 23.97 | 31.52 |

**Supplemental Figure 5. Example Checkerboard Experiment for adjacent contamination, target Ct 26.** These layouts were repeated for all combinations of our Kingfisher Flex RNA extractors and thermocyclers.

Limit of Detection with SARS-CoV-2 Analytical Q Panel 01 (SCV2AQP01-A)

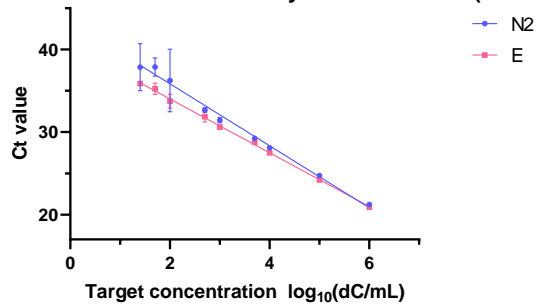

|    | Equation                 |
|----|--------------------------|
| N2 | $Y = -3.751 * X + 43.34$ |
| E  | $Y = -3.257 * X + 40.52$ |

|    | R squared |
|----|-----------|
| N2 | 0.9267    |
| E  | 0.9913    |

| Sample number | ID            | Concentration | Log10 Concentration (dC/mL) | N2-SUN 3plex MM |      |         |      | Result   |
|---------------|---------------|---------------|-----------------------------|-----------------|------|---------|------|----------|
|               |               |               |                             | N2_SUN          |      | E_FAM   |      |          |
|               |               |               |                             | Mean Ct         | SD   | Mean Ct | SD   |          |
| 1             | SCV2AQP01-S01 | 1,000,000.00  | 6.00                        | 21.24           | 0.14 | 20.91   | 0.15 | Positive |
| 2             | SCV2AQP01-S02 | 100,000.00    | 5.00                        | 24.73           | 0.22 | 24.20   | 0.14 | Positive |
| 3             | SCV2AQP01-S03 | 10,000.00     | 4.00                        | 28.09           | 0.12 | 27.48   | 0.09 | Positive |
| 4             | SCV2AQP01-S04 | 5,000.00      | 3.70                        | 29.25           | 0.13 | 28.74   | 0.22 | Positive |
| 5             | SCV2AQP01-S05 | 1,000.00      | 3.00                        | 31.44           | 0.32 | 30.58   | 0.29 | Positive |
| 6             | SCV2AQP01-S06 | 500.00        | 2.70                        | 32.66           | 0.28 | 31.84   | 0.65 | Positive |
| 7             | SCV2AQP01-S07 | 100.00        | 2.00                        | 36.25           | 3.78 | 33.73   | 0.85 | Positive |
| 8             | SCV2AQP01-S08 | 50.00         | 1.70                        | 37.88           | 1.09 | 35.23   | 0.67 | Positive |
| 9             | Qnostics '10' | 25.00         | 1.40                        | 37.84           | 2.85 | 35.86   | 0.11 | Positive |
| 10            | SCV2AQP01-S09 | 0 (Negative)  | -                           | -               | -    | -       | -    | Negative |

**Supplemental Figure 6. Limit of detection in KCL TEST employing a commercial standard.** The Qnostics panel used (SARS-CoV-2 Analytical Q Panel 01: SCV2AQP01-A) is a viral suspension which was extracted and amplified as per our sample pipeline. The standards provided range in concentrations between 1 million and 50 digital copies/mL. The lowest standard available was diluted further to provide a sample with approximately 25 copies/mL. Extractions and RT-qPCRs were repeated n=6 times. All 6 replicates showed amplification of at least one of the targets (N2 or E) for all concentrations up to 25 copies/mL. At the lowest concentration, 25 copies/mL, amplification for both targets (N2 and E) were only detected in 1 out of 6 replicates and at 50 copies/mL on 3 out of 6 replicates. There were more replicates with amplification of N2 compared to E. The mean Ct for each concentration can be seen in the table below. The mean Ct values for E and N2 between 25 and 50 copies/mL were 35 and 38, respectively.

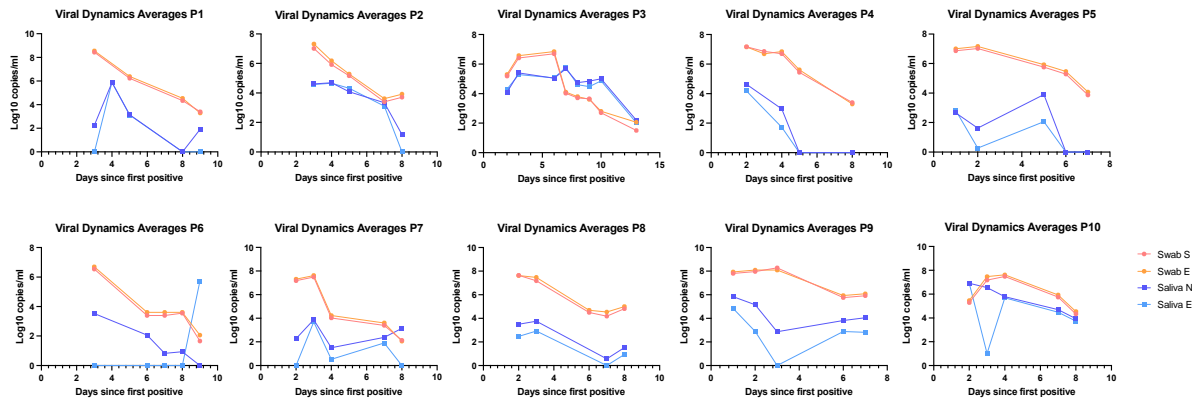

**Supplemental Figure 7. Viral dynamics comparing combined nose and throat swab vs saliva.** We observed a general trend towards having less copies per mL in saliva as compared with swabs.



### Supplemental Tables

| Target Thresholds |      |
|-------------------|------|
| N2                | 0.02 |
| E                 | 0.02 |
| RNAseP            | 0.02 |

**Supplemental Table 1. Thresholds employed in In-house Triplex SARS-COV-2 Real Time PCR.** Thresholds set to determine Ct values after RT-qPCR.

| TARGET   | Positive             | Positive at LoD      | Negative     | Inhibitory /Void | Inconclusive       |
|----------|----------------------|----------------------|--------------|------------------|--------------------|
| N2 and E | <36 for both targets | >36 for both targets | Undetermined |                  |                    |
| N2 or E  | <36 for one target   |                      |              |                  | ≥36 for one target |
| RNAse P  | <26.5                | <26.5                | <26.5        | ≥26.5            | <26.5              |

**Supplemental Table 2. Key to interpret our RT-qPCR results.**

|                         | Beckman Kit | Homebrew |
|-------------------------|-------------|----------|
| <b>Number of values</b> | 980         | 980      |
| <b>Positive</b>         | 61          | 66       |
| <b>Negative</b>         | 907         | 906      |
| <b>Inconclusive</b>     | 8           | 7        |
| <b>Void</b>             | 4           | 1        |

**Supplemental Table 3. Comparison of homebrew vs Beckman extraction.** Sample characteristics and number of detected positives/negatives and voids.
